# Supplementary material
Source: Research Square preprint supplement (doi:10.21203/rs.3.rs-9853833/v1)
Supplement: Supplementary file 1 [file 1a6d6454578672aff4c09613.docx]

**Supplementary Table 1**

Accession numbers of Yeasts sequences deposited in the NCBI-GenBank.

| **Strain**  **Code** | **Organism** | **NCBI**  **Accession number** |
| --- | --- | --- |
| SC-6 | *Candida sorboxylosa* | OQ919166 |
| SC-9 | *Candida quercitrusa* | OQ913702 |
| SC-1 | *Yarrowia lipolytica* | OQ913576 |
| FSC | *Hanseniaspora opuntiae* | OQ913574 |
| SS-A | *Candida viswanathii* | OQ913732 |

**Supplementary Table 2**

Optimized media composition for the growth of *C. sorboxylosa* and *Y. lipolytica*

| Components (g/L) | *C. sorboxylosa* | *Y. lipolytica* |
| --- | --- | --- |
| Dextrose  Glycerol | 15  - | -  20 |
| Yeast extract | 15 | 15 |
| KH2 PO4 | 1.4 | 1.4 |
| MgSO47H2O | 0.2 | 0.2 |
| NaCl | 2 | 2 |
| (NH4)2SO4 | 1.5 | 1.5 |
| FeSO4 | 0.01 | 0.01 |
| Final pH adjusted to 6.5 | | |

**Supplementary Table 3**

Media ingredients in Biotransformation media

| Components | g/L |
| --- | --- |
| Dextrose | 10 |
| Glycerol | 10 |
| L- Phe | 6 |
| MgSO47H2O | 0.4 |
| Yeast extract | 1 |

**Supplementary Table 4**

The precise medium formulation for the validation run (Run 41).

| Components | g/L |
| --- | --- |
| Dextrose | 20 |
| Glycerol | 20 |
| L-phe | 9 |
| MgSo4 | 0.6 |
| Yeast extract | 2 |

**Supplementary Table 5**

The average OD and standard deviation of three copies.

| **Run** | **OD 1** | **OD 2** | **OD 3** | **Mean** | **SD** |
| --- | --- | --- | --- | --- | --- |
| 1 | 18.2 | 17.6 | 17 | 17.6 | 0.60 |
| 2 | 15.55 | 15.65 | 15.75 | 15.65 | 0.10 |
| 3 | 15.7 | 16.1 | 16.23 | 16.01 | 0.28 |
| 4 | 15.5 | 16.3 | 16.5 | 16.1 | 0.53 |
| 5 | 14.65 | 14.85 | 15.26 | 14.92 | 0.31 |
| 6 | 15.68 | 15.98 | 16.28 | 15.98 | 0.30 |
| 7 | 17.35 | 17.55 | 17.9 | 17.6 | 0.28 |
| 8 | 14.95 | 15.03 | 15.05 | 15.01 | 0.05 |
| 9 | 16.05 | 16.15 | 16.16 | 16.12 | 0.06 |
| 10 | 17.61 | 17.71 | 17.81 | 17.71 | 0.10 |
| 11 | 14.46 | 14.56 | 14.66 | 14.56 | 0.10 |
| 12 | 16.01 | 16.31 | 16.61 | 16.31 | 0.30 |
| 13 | 15.95 | 16.08 | 16.15 | 16.06 | 0.10 |
| 14 | 14.96 | 15.04 | 15.06 | 15.02 | 0.05 |
| 15 | 15.05 | 15.24 | 15.55 | 15.28 | 0.25 |
| 16 | 12.9 | 13.1 | 13.3 | 13.1 | 0.20 |
| 17 | 15.82 | 15.96 | 16.25 | 16.01 | 0.22 |
| 18 | 16.4 | 17.1 | 17.26 | 16.92 | 0.46 |
| 19 | 15.12 | 15.06 | 14.85 | 15.01 | 0.14 |
| 20 | 15.7 | 16.1 | 16.26 | 16.02 | 0.29 |
| 21 | 14.7 | 15.15 | 15.18 | 15.01 | 0.27 |
| 22 | 16.8 | 15.75 | 16.2 | 16.25 | 0.53 |
| 23 | 14.85 | 15.63 | 15.15 | 15.21 | 0.39 |
| 24 | 13.12 | 13.08 | 12.95 | 13.05 | 0.09 |
| 25 | 17.48 | 17.05 | 17.25 | 17.26 | 0.22 |
| 26 | 16.01 | 15.91 | 16.11 | 16.01 | 0.10 |
| 27 | 13.1 | 13.15 | 13.05 | 13.1 | 0.05 |
| 28 | 16.45 | 17.2 | 16.15 | 16.6 | 0.54 |
| 29 | 16.25 | 15.75 | 16.18 | 16.06 | 0.27 |
| 30 | 16.32 | 15.92 | 15.85 | 16.03 | 0.25 |
| 31 | 15.91 | 16.01 | 16.11 | 16.01 | 0.10 |
| 32 | 15.2 | 15.39 | 15.1 | 15.23 | 0.15 |
| 33 | 16.45 | 16.55 | 16.35 | 16.45 | 0.10 |
| 34 | 15.13 | 14.8 | 15.1 | 15.01 | 0.18 |
| 35 | 18.28 | 17.65 | 17.92 | 17.95 | 0.32 |
| 36 | 15.56 | 15.75 | 15.91 | 15.74 | 0.18 |
| 37 | 13.91 | 14.25 | 13.75 | 13.97 | 0.26 |
| 38 | 17.85 | 17.6 | 16.9 | 17.45 | 0.49 |
| 39 | 20.12 | 19.81 | 19.65 | 19.86 | 0.24 |
| 40 | 16.6 | 16.95 | 16.1 | 16.55 | 0.43 |
| 41 | 18.8 | 19.2 | 19.3 | 19.1 | 0.26 |
| 42 | 15.75 | 15.96 | 16.23 | 15.98 | 0.24 |
| 43 | 14.82 | 14.65 | 14.96 | 14.81 | 0.16 |
| 44 | 14.55 | 14.62 | 14.87 | 14.68 | 0.17 |
| 45 | 15.42 | 15.22 | 15.32 | 15.32 | 0.10 |
| 46 | 16.1 | 16.24 | 15.6 | 15.98 | 0.34 |

**Supplementary Table 6**

The average yield (2-PE production) and standard deviation of three copies.

| **Run** | **Trial 1** | **Trial 2** | **Trial 3** | **Mean** | **S. D** |
| --- | --- | --- | --- | --- | --- |
| 1 | 0.98 | 0.99 | 1.03 | 1.00 | 0.03 |
| 2 | 0.79 | 0.89 | 0.69 | 0.79 | 0.10 |
| 3 | 1.08 | 1.04 | 0.88 | 1.00 | 0.11 |
| 4 | 1.04 | 0.85 | 1.14 | 1.01 | 0.15 |
| 5 | 1.25 | 1.42 | 1.53 | 1.40 | 0.14 |
| 6 | 1.21 | 1.12 | 1.18 | 1.17 | 0.05 |
| 7 | 1.39 | 1.19 | 1.29 | 1.29 | 0.10 |
| 8 | 0.75 | 1.03 | 1.10 | 0.96 | 0.19 |
| 9 | 0.83 | 0.95 | 0.92 | 0.90 | 0.06 |
| 10 | 1.36 | 1.10 | 1.20 | 1.22 | 0.13 |
| 11 | 0.81 | 0.72 | 0.78 | 0.77 | 0.05 |
| 12 | 0.98 | 1.05 | 0.94 | 0.99 | 0.06 |
| 13 | 0.90 | 1.00 | 0.80 | 0.90 | 0.10 |
| 14 | 0.98 | 0.94 | 1.05 | 0.99 | 0.06 |
| 15 | 0.91 | 1.01 | 0.81 | 0.91 | 0.10 |
| 16 | 0.84 | 0.64 | 0.74 | 0.74 | 0.10 |
| 17 | 0.96 | 0.91 | 0.98 | 0.95 | 0.04 |
| 18 | 1.08 | 1.11 | 1.17 | 1.12 | 0.05 |
| 19 | 0.78 | 0.88 | 0.68 | 0.78 | 0.10 |
| 20 | 0.85 | 0.82 | 0.76 | 0.81 | 0.05 |
| 21 | 0.95 | 1.00 | 1.02 | 0.99 | 0.04 |
| 22 | 0.69 | 0.79 | 0.89 | 0.79 | 0.10 |
| 23 | 1.17 | 1.15 | 1.10 | 1.14 | 0.04 |
| 24 | 0.67 | 0.77 | 0.57 | 0.67 | 0.10 |
| 25 | 1.06 | 0.96 | 0.86 | 0.96 | 0.10 |
| 26 | 1.01 | 0.81 | 0.91 | 0.91 | 0.10 |
| 27 | 0.55 | 0.57 | 0.54 | 0.56 | 0.02 |
| 28 | 0.82 | 0.97 | 0.91 | 0.90 | 0.08 |
| 29 | 1.07 | 0.91 | 0.98 | 0.99 | 0.08 |
| 30 | 0.91 | 0.74 | 1.11 | 0.92 | 0.19 |
| 31 | 0.61 | 0.73 | 0.85 | 0.73 | 0.12 |
| 32 | 0.96 | 1.22 | 0.82 | 1.00 | 0.20 |
| 33 | 1.13 | 1.02 | 1.06 | 1.07 | 0.06 |
| 34 | 0.88 | 0.94 | 0.95 | 0.92 | 0.04 |
| 35 | 0.84 | 0.74 | 0.71 | 0.76 | 0.07 |
| 36 | 0.82 | 0.91 | 0.93 | 0.89 | 0.06 |
| 37 | 0.38 | 0.41 | 0.41 | 0.40 | 0.02 |
| 38 | 1.09 | 0.98 | 0.91 | 1.00 | 0.09 |
| 39 | 1.14 | 1.22 | 1.27 | 1.21 | 0.07 |
| 40 | 0.85 | 1.30 | 1.45 | 1.20 | 0.31 |
| 41 | 1.44 | 1.72 | 1.22 | 1.46 | 0.25 |
| 42 | 0.93 | 0.93 | 0.84 | 0.90 | 0.05 |
| 43 | 0.84 | 0.92 | 0.97 | 0.91 | 0.06 |
| 44 | 0.82 | 0.88 | 0.97 | 0.89 | 0.08 |
| 45 | 1.08 | 0.75 | 0.80 | 0.88 | 0.18 |
| 46 | 0.90 | 0.79 | 0.75 | 0.81 | 0.08 |

**Supplementary Table 7**

Comparison of the predicted and experimental values- OD

| **Run Order** | **Actual Value** | **Predicted Value** | **Residual** | **Leverage** | **Internally Studentized Residuals** | **Externally Studentized Residuals** | **Cook's Distance** | **Influence on Fitted Value DFFITS** | **Standard**  **Order** |
| --- | --- | --- | --- | --- | --- | --- | --- | --- | --- |
| 1 | 17.60 | 17.56 | 0.0400 | 0.397 | 0.168 | 0.165 | 0.001 | 0.134 | 40 |
| 2 | 15.65 | 15.45 | 0.2000 | 0.397 | 0.840 | 0.835 | 0.029 | 0.677 | 25 |
| 3 | 16.01 | 15.91 | 0.1043 | 0.022 | 0.344 | 0.339 | 0.000 | 0.051 | 45 |
| 4 | 16.10 | 16.05 | 0.0481 | 0.397 | 0.202 | 0.199 | 0.002 | 0.161 | 16 |
| 5 | 14.92 | 14.87 | 0.0500 | 0.397 | 0.210 | 0.206 | 0.002 | 0.167 | 34 |
| 6 | 15.98 | 15.57 | 0.4131 | 0.397 | 1.734 | 1.798 | 0.124 | 1.458 | 17 |
| 7 | 17.60 | 17.87 | -0.2663 | 0.397 | -1.118 | -1.123 | 0.051 | -0.910 | 9 |
| 8 | 15.01 | 15.23 | -0.2163 | 0.397 | -0.908 | -0.905 | 0.034 | -0.734 | 38 |
| 9 | 16.12 | 16.29 | -0.1650 | 0.397 | -0.693 | -0.687 | 0.020 | -0.557 | 31 |
| 10 | 17.71 | 17.53 | 0.1831 | 0.397 | 0.769 | 0.763 | 0.024 | 0.619 | 1 |
| 11 | 14.56 | 14.80 | -0.2444 | 0.397 | -1.026 | -1.027 | 0.043 | -0.833 | 13 |
| 12 | 16.31 | 16.62 | -0.3082 | 0.397 | -1.294 | -1.309 | 0.069 | -1.062 | 22 |
| 13 | 16.06 | 16.17 | -0.1082 | 0.397 | -0.454 | -0.448 | 0.008 | -0.363 | 24 |
| 14 | 15.02 | 15.40 | -0.3763 | 0.397 | -1.580 | -1.622 | 0.103 | -1.315 | 37 |
| 15 | 15.28 | 15.91 | -0.6257 | 0.022 | -2.063 | -2.189 | 0.006 | -0.326 | 41 |
| 16 | 13.10 | 13.21 | -0.1113 | 0.397 | -0.467 | -0.461 | 0.009 | -0.374 | 10 |
| 17 | 16.01 | 15.91 | 0.1043 | 0.022 | 0.344 | 0.339 | 0.000 | 0.051 | 42 |
| 18 | 16.92 | 16.83 | 0.0950 | 0.397 | 0.399 | 0.393 | 0.007 | 0.319 | 7 |
| 19 | 15.01 | 15.06 | -0.0457 | 0.397 | -0.192 | -0.189 | 0.002 | -0.153 | 19 |
| 20 | 16.02 | 16.33 | -0.3094 | 0.397 | -1.299 | -1.315 | 0.069 | -1.066 | 15 |
| 21 | 15.01 | 14.96 | 0.0537 | 0.397 | 0.226 | 0.222 | 0.002 | 0.180 | 29 |
| 22 | 16.25 | 16.18 | 0.0750 | 0.397 | 0.315 | 0.310 | 0.004 | 0.251 | 8 |
| 23 | 15.21 | 15.17 | 0.0375 | 0.397 | 0.157 | 0.155 | 0.001 | 0.125 | 26 |
| 24 | 13.05 | 13.31 | -0.2594 | 0.397 | -1.089 | -1.093 | 0.049 | -0.886 | 2 |
| 25 | 17.26 | 17.49 | -0.2294 | 0.397 | -0.963 | -0.962 | 0.038 | -0.780 | 20 |
| 26 | 16.01 | 15.91 | 0.1043 | 0.022 | 0.344 | 0.339 | 0.000 | 0.051 | 43 |
| 27 | 13.10 | 12.97 | 0.1300 | 0.397 | 0.546 | 0.539 | 0.012 | 0.437 | 11 |
| 28 | 16.60 | 16.21 | 0.3868 | 0.397 | 1.624 | 1.672 | 0.108 | 1.356 | 23 |
| 29 | 16.06 | 16.12 | -0.0613 | 0.397 | -0.257 | -0.253 | 0.003 | -0.205 | 30 |
| 30 | 16.03 | 15.91 | 0.1243 | 0.022 | 0.410 | 0.404 | 0.000 | 0.060 | 44 |
| 31 | 16.01 | 16.21 | -0.1975 | 0.397 | -0.829 | -0.825 | 0.028 | -0.669 | 33 |
| 32 | 15.23 | 15.91 | -0.6757 | 0.022 | -2.227 | -2.397 | 0.007 | -0.357 | 46 |
| 33 | 16.45 | 16.21 | 0.2437 | 0.397 | 1.023 | 1.024 | 0.043 | 0.830 | 6 |
| 34 | 15.01 | 14.93 | 0.0837 | 0.397 | 0.351 | 0.346 | 0.005 | 0.281 | 35 |
| 35 | 17.95 | 17.62 | 0.3312 | 0.397 | 1.391 | 1.413 | 0.079 | 1.146 | 36 |
| 36 | 15.74 | 15.51 | 0.2293 | 0.397 | 0.963 | 0.962 | 0.038 | 0.780 | 18 |
| 37 | 13.97 | 13.61 | 0.3631 | 0.397 | 1.524 | 1.560 | 0.096 | 1.265 | 3 |
| 38 | 17.45 | 17.32 | 0.1337 | 0.397 | 0.561 | 0.555 | 0.013 | 0.450 | 28 |
| 39 | 19.86 | 19.58 | 0.2850 | 0.397 | 1.196 | 1.205 | 0.059 | 0.977 | 12 |
| 40 | 16.55 | 16.44 | 0.1131 | 0.397 | 0.475 | 0.469 | 0.009 | 0.380 | 14 |
| 41 | 19.10 | 19.18 | -0.0794 | 0.397 | -0.333 | -0.328 | 0.005 | -0.266 | 4 |
| 42 | 15.98 | 15.68 | 0.2962 | 0.397 | 1.244 | 1.255 | 0.064 | 1.018 | 27 |
| 43 | 14.81 | 14.62 | 0.1868 | 0.397 | 0.784 | 0.779 | 0.025 | 0.632 | 21 |
| 44 | 14.68 | 14.42 | 0.2637 | 0.397 | 1.107 | 1.111 | 0.050 | 0.901 | 5 |
| 45 | 15.32 | 15.44 | -0.1200 | 0.397 | -0.504 | -0.498 | 0.010 | -0.403 | 39 |
| 46 | 15.98 | 16.26 | -0.2800 | 0.397 | -1.176 | -1.183 | 0.057 | -0.960 | 32 |

| Best Lambda | 0.7000 |
| --- | --- |
| 95% CI Low | -0.2800 |
| 95% CI High | 1.67 |

**Supplementary Table 8**

Comparison of the predicted and experimental values- 2-PE production (g/L)

| **Run Order** | **Actual Value** | **Predicted Value** | **Residual** | **Leverage** | **Internally Studentized Residuals** | **Externally Studentized Residuals** | **Cook's Distance** | **Influence on Fitted Value DFFITS** | **Standard**  **Order** |
| --- | --- | --- | --- | --- | --- | --- | --- | --- | --- |
| 1 | 1.0000 | 0.9843 | 0.0157 | 0.397 | 0.617 | 0.611 | 0.016 | 0.495 | 40 |
| 2 | 0.7900 | 0.7682 | 0.0218 | 0.397 | 0.857 | 0.853 | 0.030 | 0.692 | 25 |
| 3 | 1.00 | 0.9465 | 0.0555 | 0.022 | 1.714 | 1.774 | 0.004 | 0.264 | 45 |
| 4 | 1.01 | 0.9897 | 0.0203 | 0.397 | 0.800 | 0.795 | 0.026 | 0.645 | 16 |
| 5 | 1.40 | 1.37 | 0.0337 | 0.397 | 1.327 | 1.344 | 0.072 | 1.090 | 34 |
| 6 | 1.17 | 1.16 | 0.0123 | 0.397 | 0.485 | 0.478 | 0.010 | 0.388 | 17 |
| 7 | 1.29 | 1.31 | -0.0232 | 0.397 | -0.911 | -0.909 | 0.034 | -0.737 | 9 |
| 8 | 0.9600 | 0.9400 | 0.0200 | 0.397 | 0.785 | 0.780 | 0.025 | 0.633 | 38 |
| 9 | 0.8950 | 0.9175 | -0.0225 | 0.397 | -0.884 | -0.881 | 0.032 | -0.714 | 31 |
| 10 | 1.22 | 1.20 | 0.0169 | 0.397 | 0.663 | 0.657 | 0.018 | 0.533 | 1 |
| 11 | 0.7650 | 0.7879 | -0.0229 | 0.397 | -0.900 | -0.897 | 0.033 | -0.728 | 13 |
| 12 | 0.9900 | 1.01 | -0.0232 | 0.397 | -0.913 | -0.911 | 0.034 | -0.739 | 22 |
| 13 | 0.8950 | 0.9111 | -0.0161 | 0.397 | -0.634 | -0.628 | 0.017 | -0.509 | 24 |
| 14 | 0.9900 | 0.9862 | 0.0038 | 0.397 | 0.148 | 0.146 | 0.001 | 0.118 | 37 |
| 15 | 0.9132 | 0.9465 | -0.0333 | 0.022 | -1.029 | -1.030 | 0.001 | -0.154 | 41 |
| 16 | 0.7402 | 0.7416 | -0.0014 | 0.397 | -0.054 | -0.053 | 0.000 | -0.043 | 10 |
| 17 | 0.9500 | 0.9465 | 0.0035 | 0.022 | 0.107 | 0.106 | 0.000 | 0.016 | 42 |
| 18 | 1.12 | 1.09 | 0.0326 | 0.397 | 1.282 | 1.296 | 0.068 | 1.051 | 7 |
| 19 | 0.7821 | 0.7686 | 0.0135 | 0.397 | 0.531 | 0.525 | 0.012 | 0.426 | 19 |
| 20 | 0.8050 | 0.8428 | -0.0378 | 0.397 | -1.486 | -1.518 | 0.091 | -1.231 | 15 |
| 21 | 0.9850 | 1.04 | -0.0512 | 0.397 | -2.013 | -2.128 | 0.166 | -1.725 | 29 |
| 22 | 0.7912 | 0.7724 | 0.0188 | 0.397 | 0.739 | 0.733 | 0.022 | 0.595 | 8 |
| 23 | 1.14 | 1.16 | -0.0181 | 0.397 | -0.711 | -0.705 | 0.021 | -0.571 | 26 |
| 24 | 0.6650 | 0.6586 | 0.0064 | 0.397 | 0.252 | 0.248 | 0.003 | 0.201 | 2 |
| 25 | 0.9550 | 0.9628 | -0.0078 | 0.397 | -0.305 | -0.301 | 0.004 | -0.244 | 20 |
| 26 | 0.9123 | 0.9465 | -0.0342 | 0.022 | -1.057 | -1.059 | 0.002 | -0.158 | 43 |
| 27 | 0.5550 | 0.5486 | 0.0064 | 0.397 | 0.253 | 0.249 | 0.003 | 0.202 | 11 |
| 28 | 0.9000 | 0.9213 | -0.0213 | 0.397 | -0.839 | -0.834 | 0.029 | -0.677 | 23 |
| 29 | 0.9890 | 1.02 | -0.0296 | 0.397 | -1.163 | -1.170 | 0.056 | -0.949 | 30 |
| 30 | 0.9200 | 0.9465 | -0.0265 | 0.022 | -0.819 | -0.815 | 0.001 | -0.121 | 44 |
| 31 | 0.7300 | 0.6885 | 0.0415 | 0.397 | 1.634 | 1.683 | 0.110 | 1.365 | 33 |
| 32 | 1.00 | 0.9465 | 0.0575 | 0.022 | 1.775 | 1.845 | 0.004 | 0.275 | 46 |
| 33 | 1.07 | 1.06 | 0.0100 | 0.397 | 0.392 | 0.386 | 0.006 | 0.313 | 6 |
| 34 | 0.9243 | 0.9422 | -0.0179 | 0.397 | -0.705 | -0.699 | 0.020 | -0.567 | 35 |
| 35 | 0.7634 | 0.7891 | -0.0257 | 0.397 | -1.012 | -1.013 | 0.042 | -0.821 | 36 |
| 36 | 0.8881 | 0.8971 | -0.0090 | 0.397 | -0.352 | -0.347 | 0.005 | -0.281 | 18 |
| 37 | 0.4012 | 0.4275 | -0.0263 | 0.397 | -1.036 | -1.037 | 0.044 | -0.841 | 3 |
| 38 | 0.9960 | 0.9973 | -0.0013 | 0.397 | -0.053 | -0.052 | 0.000 | -0.042 | 28 |
| 39 | 1.21 | 1.18 | 0.0282 | 0.397 | 1.110 | 1.115 | 0.051 | 0.904 | 12 |
| 40 | 1.20 | 1.17 | 0.0352 | 0.397 | 1.386 | 1.409 | 0.079 | 1.143 | 14 |
| 41 | 1.46 | 1.50 | -0.0368 | 0.397 | -1.448 | -1.476 | 0.086 | -1.197 | 4 |
| 42 | 0.9010 | 0.8625 | 0.0385 | 0.397 | 1.515 | 1.550 | 0.094 | 1.257 | 27 |
| 43 | 0.9120 | 0.9404 | -0.0284 | 0.397 | -1.118 | -1.123 | 0.051 | -0.911 | 21 |
| 44 | 0.8900 | 0.8662 | 0.0238 | 0.397 | 0.935 | 0.933 | 0.036 | 0.756 | 5 |
| 45 | 0.8750 | 0.8755 | -0.0005 | 0.397 | -0.020 | -0.020 | 0.000 | -0.016 | 39 |
| 46 | 0.8130 | 0.8139 | -0.0009 | 0.397 | -0.035 | -0.034 | 0.000 | -0.028 | 32 |

| Best Lambda | 1.04 |
| --- | --- |
| 95% CI Low | 0.7800 |
| 95% CI High | 1.30 |

**Supplementary Table 9**

9a. ANOVA for 2FI model

Response 1: Optical density

| **Source** | **Sum of Squares** | **df** | **Mean Square** | **F-value** | **p-value** |  |
| --- | --- | --- | --- | --- | --- | --- |
| **Model** | 82.03 | 15 | 5.47 | 58.14 | < 0.0001 | significant |
| A-Dextrose | 1.84 | 1 | 1.84 | 19.52 | 0.0001 |  |
| B-Glycerol | 3.8 | 1 | 3.8 | 40.43 | < 0.0001 |  |
| C-L-phenylalanine | 1.3 | 1 | 1.3 | 13.82 | 0.0008 |  |
| D-MgSO4.7H20 | 5.65 | 1 | 5.65 | 60.1 | < 0.0001 |  |
| E-Yeast Extract | 2.15 | 1 | 2.15 | 22.9 | < 0.0001 |  |
| AB | 23.96 | 1 | 23.96 | 254.75 | < 0.0001 |  |
| AC | 0.912 | 1 | 0.912 | 9.7 | 0.004 |  |
| AD | 0.912 | 1 | 0.912 | 9.7 | 0.004 |  |
| AE | 4.06 | 1 | 4.06 | 43.17 | < 0.0001 |  |
| BC | 1.04 | 1 | 1.04 | 11.06 | 0.0023 |  |
| BD | 1.31 | 1 | 1.31 | 13.94 | 0.0008 |  |
| BE | 31.7 | 1 | 31.7 | 337 | < 0.0001 |  |
| CD | 1.49 | 1 | 1.49 | 15.82 | 0.0004 |  |
| CE | 0.354 | 1 | 0.354 | 3.76 | 0.0618 |  |
| DE | 1.55 | 1 | 1.55 | 16.48 | 0.0003 |  |
| **Residual** | 2.82 | 30 | 0.0941 |  |  |  |
| Lack of Fit | 2.05 | 25 | 0.082 | 0.5313 | 0.8666 | not significant |
| Pure Error | 0.7717 | 5 | 0.1543 |  |  |  |
| **Cor Total** | 84.85 | 45 |  |  |  |  |

9b. Response 1: Optical density: Fit Summary

| **Source** | **Sequential p-Value** | **Lack of fit p-value** | **Adjusted R2** | **Predicted R2** |  |
| --- | --- | --- | --- | --- | --- |
| Linear | 0.1611 | 0.0048 | 0.0705 | -0.1314 |  |
| 2F1 | ˂0.0001 | 0.8666 | 0.9501 | 0.9266 | Suggested |
| Quadratic | 0.7982 | 0.8207 | 0.9452 | 0.9016 |  |
| Cubic | 0.6432 | 0.7707 | 0.9388 | 0.6988 | Aliased |

9c. Response 1: Optical density: ANOVA: Fit Statistics

| **Std. Dev.** | **0.3067** | **R²** | **0.9667** |
| --- | --- | --- | --- |
| Mean | 15.91 | Adjusted R² | 0.9501 |
| C.V. % | 1.93 | Predicted R² | 0.9266 |
|  |  | Adeq Precision | 36.5174 |

**Supplementary Table 10**

10a. ANOVA for 2FI model

Response 2: 2-PE (g/L)

| **Source** | **Sum of Squares** | **df** | **Mean Square** | **F-value** | **p-value** |  |
| --- | --- | --- | --- | --- | --- | --- |
| **Model** | 1.75 | 15 | 0.1164 | 108.62 | < 0.0001 | significant |
| A-Dextrose | 0.2753 | 1 | 0.2753 | 256.97 | < 0.0001 |  |
| B-Glycerol | 0.0039 | 1 | 0.0039 | 3.66 | 0.0654 |  |
| C-L-phenylalanine | 0.0147 | 1 | 0.0147 | 13.71 | 0.0009 |  |
| D-MgSO4.7H20 | 0.0044 | 1 | 0.0044 | 4.12 | 0.0513 |  |
| E-Yeast Extract | 0.1046 | 1 | 0.1046 | 97.6 | < 0.0001 |  |
| AB | 0.6511 | 1 | 0.6511 | 607.67 | < 0.0001 |  |
| AC | 0.0133 | 1 | 0.0133 | 12.45 | 0.0014 |  |
| AD | 0.0163 | 1 | 0.0163 | 15.17 | 0.0005 |  |
| AE | 0.1726 | 1 | 0.1726 | 161.09 | < 0.0001 |  |
| BC | 0.0017 | 1 | 0.0017 | 1.61 | 0.2146 |  |
| BD | 0.006 | 1 | 0.006 | 5.61 | 0.0245 |  |
| BE | 0.3635 | 1 | 0.3635 | 339.25 | < 0.0001 |  |
| CD | 0.0647 | 1 | 0.0647 | 60.4 | < 0.0001 |  |
| CE | 0.0018 | 1 | 0.0018 | 1.73 | 0.1989 |  |
| DE | 0.0517 | 1 | 0.0517 | 48.26 | < 0.0001 |  |
| **Residual** | 0.0321 | 30 | 0.0011 |  |  |  |
| Lack of Fit | 0.0228 | 25 | 0.0009 | 0.4916 | 0.8917 | not significant |
| Pure Error | 0.0093 | 5 | 0.0019 |  |  |  |
| **Cor Total** | 1.78 | 45 |  |  |  |  |

10b. Response 1: 2-PE (g/L): Fit Summary

| **Source** | **Sequential p-value** | **Lack of Fit p-value** | **Adjusted R²** | **Predicted R²** | |  |
| --- | --- | --- | --- | --- | --- | --- |
| Linear | 0.0587 | 0.0015 | 0.13 | -0.0605 |  | |
| 2FI | < 0.0001 | 0.8917 | 0.9729 | 0.9593 | Suggested | |
| Quadratic | 0.5529 | 0.8813 | 0.972 | 0.9512 |  | |
| Cubic | 0.6917 | 0.8395 | 0.9674 | 0.8629 | Aliased | |

10c. Response 1: 2-PE (g/L): ANOVA: Fit Statistics

| **Std. Dev.** | **0.0327** | **R²** | **0.9819** |
| --- | --- | --- | --- |
| Mean | 0.9465 | Adjusted R² | 0.9729 |
| C.V. % | 3.46 | Predicted R² | 0.9593 |
|  |  | Adeq Precision | 55.3881 |

**Supplementary Table 11**

Fundamental genes involved in shikimate pathway and Ehrlich pathway of *C. sorboxylosa*.

| Gene name | *Candida sorboxylosa* Gene | Log 2FC | Regulation | P -Vlaue | Adjusted  p-values | Organism |
| --- | --- | --- | --- | --- | --- | --- |
| GAP1 | DN110935  DN3688  DN87205  DN87205 | 5.8412  5.1171  1.0151812  5.275054 | Up  Up  Up  Up | NA  NA  0.495241245  NA | NA  NA  NA  NA | *S. cerevisiae*  *C. albicans*  *Candida glabrata*  *Candida glabrata* |
| BCAA Permease | DN53444 | 5.9263 | Up | NA | NA | *B.bassiana* |
| ATP-dependent permease MDL1 | DN95919 | 5.2464 | Up | NA | NA | *S. cerevisiae* |
| ATPbinding/permease protein CydD | DN92873 | 4.7270 | Up | 0.094504463 | NA | *S. cerevisiae* |
| ARO1 | DN86206  DN53580  DN88374  DN101798 | -0.4458  -0.9491  -1.1847  -3.0590 | Down  Down  Down  Down | NA  0.72574793  0.664996793  0.282039237 | NA  NA  NA  NA | *K. lactis*  *C.usitaniae*  *L.thermotolerance*  *L.bicolor* |
| ARO2 | DN86988 | 0.49176 | Down | 0.816964677 | NA | *S. cerevisiae* |
| ARO3 | DN81648 | 0.2247 | Down | 0.685547413 | 0.97683043 | *C. albicans* |
| ARO4 | DN85620 | -2.7925 | Down | 0.308090916 | NA | *S. cerevisiae* |
| ARO7 | DN81664 | -3.6567 | Down | 0.147533034 | NA | *S. cerevisiae* |
| PHA2 | DN3326 | -3.7782 | Down | NA | NA | *B. bassiana* |
| ARO8 | DN86933 | 6.49184 | Up | NA | NA | *S. cerevisiae* |
| DN47851 | 2.2791 | Up | 2.58E-07 | 6.70E-05 | *S. cerevisiae* |
| ARO9 | DN86628 | 6.7256 | Up | 0.009985022 | NA | *R.oryzae* |
| DN45691 | 4.6785 | Up | NA | NA | *P.kernoviae* |
| ARO10 | DN85655 | 3.1958 | Up | 2.22E-14 | 2.88E-11 | *S. cerevisiae* |
| ADH1 | DN3502  DN84966 | 5.0781  2.30642 | Up  Up | 0.064307289 | NA | *S.stipitis* |
| 0.390335323 | 0.91384216 | *Kluyveromyces marxianus* |
| ADH3 | DN100294 | 4.973306 | Up | NA | NA | *Emericella nidulans* |
| ADH4 | DN60431  DN58191 | 4.9293  4.4160 | Up  Up | NA  0.120455857 | NA  NA | *S.pombe*  *S.pombe* |
| ADH6 | DN85705 | 4.5972 | Up | NA | NA | *S. cerevisiae* |
| ADH | DN74426  DN76692  DN79455 | 5.803  5.3661  5.1539 | Up  Up  Up | NA  NA  NA | NA  NA  NA | *NA*  *NA*  *NA* |
| DN1227  DN75204  DN83477  DN41726  DN605  DN72811  DN86558  DN90329  DN86558 | 5.1108  4.5647  3.52766  6.2582377  6.2117462  6.1779637  4.8968325  5.6869808  2.1123739 | Up  Up  Up  Up  Up  Up  Up  Up  Up | NA  NA  NA  NA  NA  NA  NA  NA  6.44E-05 | NA  NA  NA  NA  NA  NA  NA  NA  0.006966272 | *R.microsporous*  *B.bassiana*  *Morganella*  *Morganella*  *Phaeoacremonium minimum*  *Pseudogymnoascus sp.*  *Saccharomyces cerevisiae*  *Ustilago maydis*  *Saccharomyces cerevisiae* |

**Supplementary Table 12**

BLASTp-based identification of putative 2-phenylethanol biosynthesis genes in *C. sorboxylosa* using *Saccharomyces cerevisiae* as reference*.*

| **Gene_ID** | **Uniprot_ID** | **Accession** | **Identity** | **E-value** | **Score** |
| --- | --- | --- | --- | --- | --- |
| **GAP-1** |  |  |  |  |  |
| DN110935_c0_g1_i1 | sp|P19145|GAP1_YEAST | P19145 | 52.6 | 4.20E-17 | 84.7 |
| **ADH** |  |  |  |  |  |
| DN86558_c1_g1_i1 | sp|P25377|ADH7_YEAST | P25377 | 46.2 | 8.00E-83 | 305.4 |
| DN86558_c1_g1_i3 | sp|P25377|ADH7_YEAST | P25377 | 46.4 | 3.10E-43 | 173.3 |
| **ARO8** |  |  |  |  |  |
| DN86933_c1_g1_i1 | sp|P53090|ARO8_YEAST | P53090 | 48.4 | 2.50E-24 | 109.4 |
| DN86933_c1_g1_i2 | sp|P53090|ARO8_YEAST | P53090 | 48.4 | 2.60E-24 | 109.4 |
| DN86933_c1_g2_i1 | sp|P53090|ARO8_YEAST | P53090 | 52.6 | 5.20E-12 | 67.8 |
| DN86933_c1_g2_i2 | sp|P53090|ARO8_YEAST | P53090 | 51.5 | 5.00E-15 | 77.8 |
| DN47851_c0_g1_i1 | sp|P53090|ARO8_YEAST | P53090 | 51.1 | 5.80E-77 | 285.8 |
| **ARO10** |  |  |  |  |  |
| DN85655_c2_g1_i1 | sp|Q06408|ARO10_YEAST | Q06408 | 40.7 | 2.30E-31 | 133.3 |
| DN85655_c3_g2_i1 | sp|Q06408|ARO10_YEAST | Q06408 | 32.7 | 2.30E-48 | 191 |

**Supplementary Table 13**

COG classification of differentially expressed genes showing the number of upregulated and downregulated genes in each functional category, with emphasis on categories related to amino acid metabolism and secondary metabolite biosynthesis relevant to 2-PE production via the Ehrlich pathway.

| **Code** | **Description** | **Gene Number**  **(Up)** | **Gene Number**  **(Down)** |
| --- | --- | --- | --- |
| E | Amino acid transport and metabolism | [6](file:///E:\Honey\honey\2026\Article%20-1st\Fermentation%20MDPI\Reviewer%20comments\13.04.2026\Control-VS-Test\Control-VS-Test.E_Ups.xlsx) | [2](file:///E:\Honey\honey\2026\Article%20-1st\Fermentation%20MDPI\Reviewer%20comments\13.04.2026\Control-VS-Test\Control-VS-Test.E_Down.xlsx) |
| Q | Secondary metabolites biosynthesis, transport and catabolism | [1](file:///E:\Honey\honey\2026\Article%20-1st\Fermentation%20MDPI\Reviewer%20comments\13.04.2026\Control-VS-Test\Control-VS-Test.Q_Ups.xlsx) | [0](file:///E:\Honey\honey\2026\Article%20-1st\Fermentation%20MDPI\Reviewer%20comments\13.04.2026\Control-VS-Test\Control-VS-Test.Q_Down.xlsx) |

**Supplementary Table 14**

Gene Ontology (GO) enrichment analysis of differentially expressed genes. Terms associated with amino acid catabolism and enzymatic activities relevant to 2-PE production via the Ehrlich pathway are highlighted.

| **Category** | **Term** | **Ontology** | **Over_represented_pvalue** | **Over_represented_FDR** | **GeneNumber (Up)** | **GeneNumber (Down)** | |
| --- | --- | --- | --- | --- | --- | --- | --- |
| GO:0000949 | aromatic amino acid family catabolic process to alcohol via Ehrlich pathway | BP | 0.032119 | 1 | [1](file:///E:\Honey\honey\2026\Article%20-1st\Fermentation%20MDPI\Reviewer%20comments\13.04.2026\Control-VS-Test\Control-VS-Test.GO_0000949_Ups.xlsx) | [0](file:///E:\Honey\honey\2026\Article%20-1st\Fermentation%20MDPI\Reviewer%20comments\13.04.2026\Control-VS-Test\Control-VS-Test.GO_0000949_Down.xlsx) | |
| GO:0000950 | branched-chain amino acid catabolic process to alcohol via Ehrlich pathway | BP | 0.032119 | 1 | [1](file:///E:\Honey\honey\2026\Article%20-1st\Fermentation%20MDPI\Reviewer%20comments\13.04.2026\Control-VS-Test\Control-VS-Test.GO_0000950_Ups.xlsx) | [0](file:///E:\Honey\honey\2026\Article%20-1st\Fermentation%20MDPI\Reviewer%20comments\13.04.2026\Control-VS-Test\Control-VS-Test.GO_0000950_Down.xlsx) | |
| GO:0050177 | phenylpyruvate decarboxylase activity | MF | 0.032119 | 1 | [1](file:///E:\Honey\honey\2026\Article%20-1st\Fermentation%20MDPI\Reviewer%20comments\13.04.2026\Control-VS-Test\Control-VS-Test.GO_0050177_Ups.xlsx) | [0](file:///E:\Honey\honey\2026\Article%20-1st\Fermentation%20MDPI\Reviewer%20comments\13.04.2026\Control-VS-Test\Control-VS-Test.GO_0050177_Down.xlsx) | |
| GO:0050546 | 4-hydroxyphenylpyruvate decarboxylase activity | MF | 0.032119 | 1 | [1](file:///E:\Honey\honey\2026\Article%20-1st\Fermentation%20MDPI\Reviewer%20comments\13.04.2026\Control-VS-Test\Control-VS-Test.GO_0050546_Ups.xlsx) | [0](file:///E:\Honey\honey\2026\Article%20-1st\Fermentation%20MDPI\Reviewer%20comments\13.04.2026\Control-VS-Test\Control-VS-Test.GO_0050546_Down.xlsx) | |
| GO:0006559 | L-phenylalanine catabolic process | BP | 0.038589 | 1 | [1](file:///E:\Honey\honey\2026\Article%20-1st\Fermentation%20MDPI\Reviewer%20comments\13.04.2026\Control-VS-Test\Control-VS-Test.GO_0006559_Ups.xlsx) | [0](file:///E:\Honey\honey\2026\Article%20-1st\Fermentation%20MDPI\Reviewer%20comments\13.04.2026\Control-VS-Test\Control-VS-Test.GO_0006559_Down.xlsx) |  |

**Supplementary Table 15**

KEGG pathway enrichment analysis of differentially expressed, showing significantly enriched metabolic pathways and the distribution of upregulated and downregulated genes, with emphasis on pathways relevant to the Ehrlich pathway.

| **Pathway** | **Level1** | **Level2** | **DEGs with Pathway annotation (31)** | **All genes with Pathway annotation (5491)** | **P-value** | **Q-value** | **Gene**  **Number (Up)** | **Gene**  **Number (Down)** |
| --- | --- | --- | --- | --- | --- | --- | --- | --- |
| Pyruvate metabolism | Metabolism | Carbohydrate metabolism | 6(19.35%) | 265(4.83%) | 0.000545 | 0.006545 | [1](file:///E:\Honey\honey\2026\Article%20-1st\Fermentation%20MDPI\Reviewer%20comments\13.04.2026\Control-VS-Test\Control-VS-Test.ko00620_Ups.xlsx) | [5](file:///E:\Honey\honey\2026\Article%20-1st\Fermentation%20MDPI\Reviewer%20comments\13.04.2026\Control-VS-Test\Control-VS-Test.ko00620_Down.xlsx) |

**Supplementary Figures**

**Supplementary Figure-1**

Experimental versus predicted OD values generated by the selected 2FI model. The plot demonstrates the agreement between observed and model- predicted biomass responses under the tested conditions. The predicted optimum OD was 19.17, with a 95% prediction interval of 18.43-19.9.

**
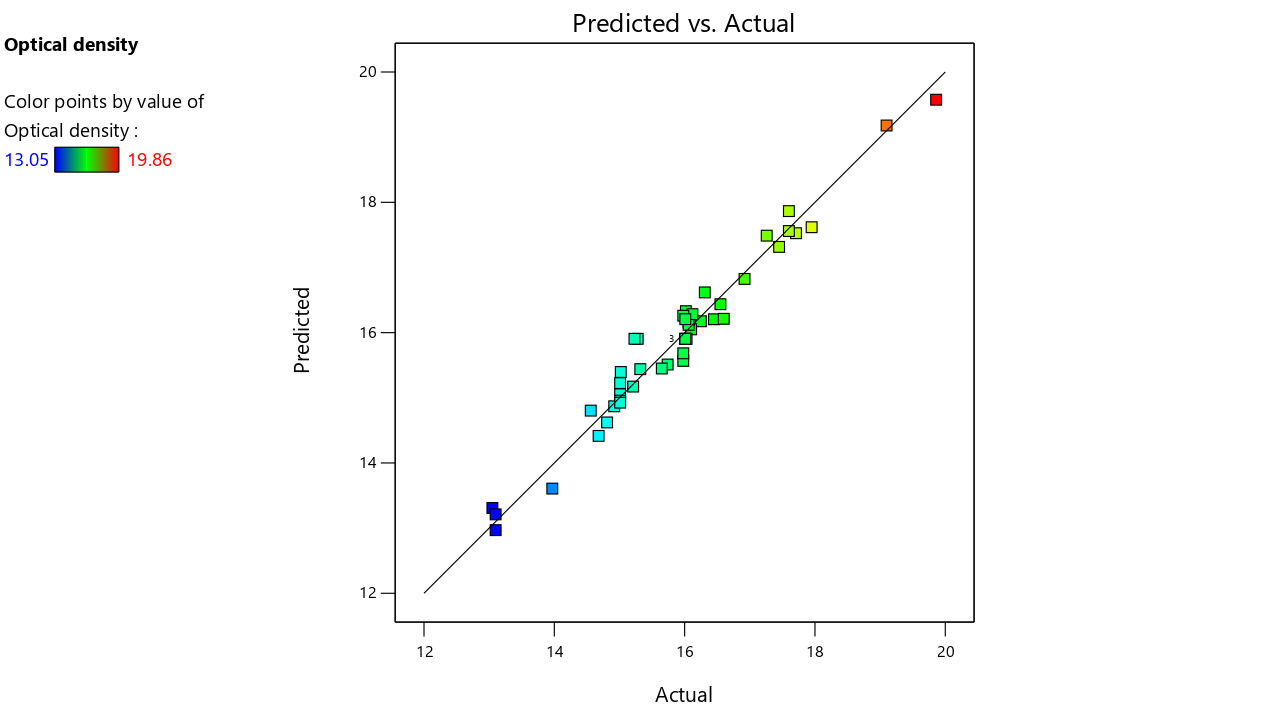
**

**Supplementary Figure -2**

Experimental versus predicted 2-PE yield (g/L) values generated by the selected 2FI model. The plot demonstrates the agreement between observed and model-predicted 2-PE production under the tested conditions. The predicted optimum 2-PE yield was 1.49 g/L, with a 95% prediction interval of 1.41-1.57 g/L.

**
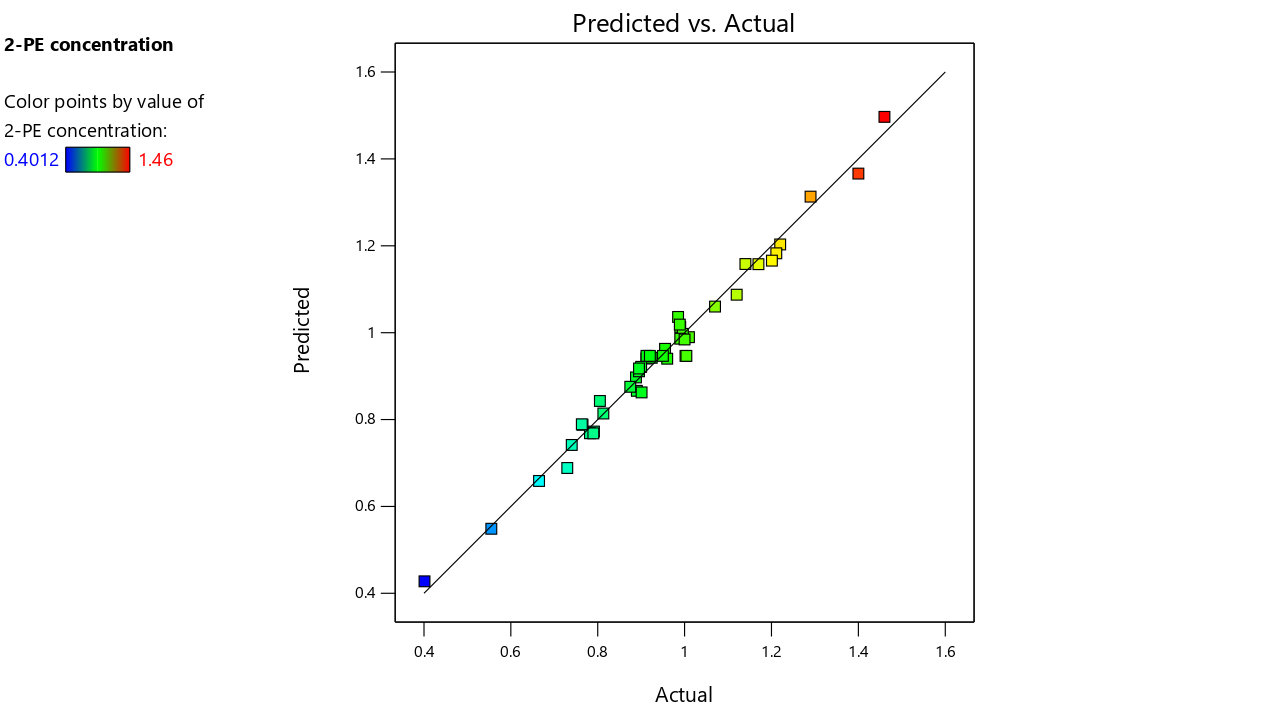
**

**Supplementary Figure-3**

Calibration curve of 2-PE Analysis

**Supplementary Figure-4**

Gas chromatography-flame ionization detection (GC-FID) analysis of 2-phenylethanol from *C. sorboxylosa* fermentation. The chromatogram represents the selected retention window around the target analyte peak, the peak corresponding to 2-phenylethanol at retention time 7.176 min with a peak area of 348.544.


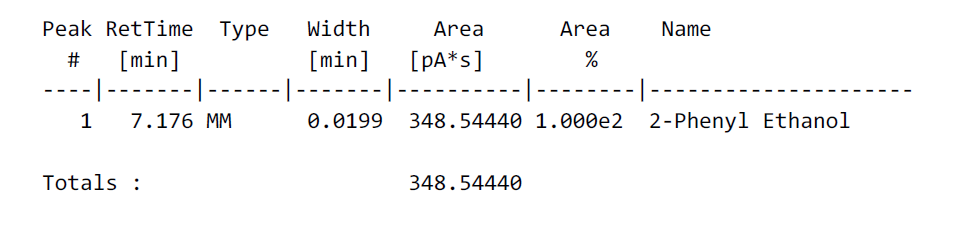


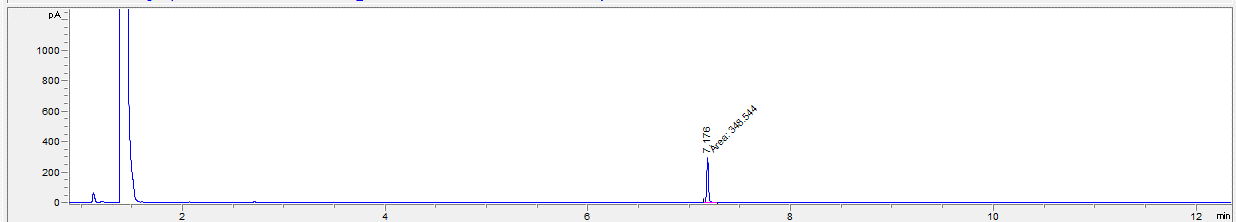


**Concentration, ppm**

**Supplementary Figure-5**

Differential gene expression clustering heatmap.
Red indicates high expression, while blue indicates low expression, with the color gradient from blue to red representing increasing gene expression levels. C1, C2, and C3 represent control groups without L-Phe, whereas T1, T2, and T3 represent test groups supplemented with L-Phe.


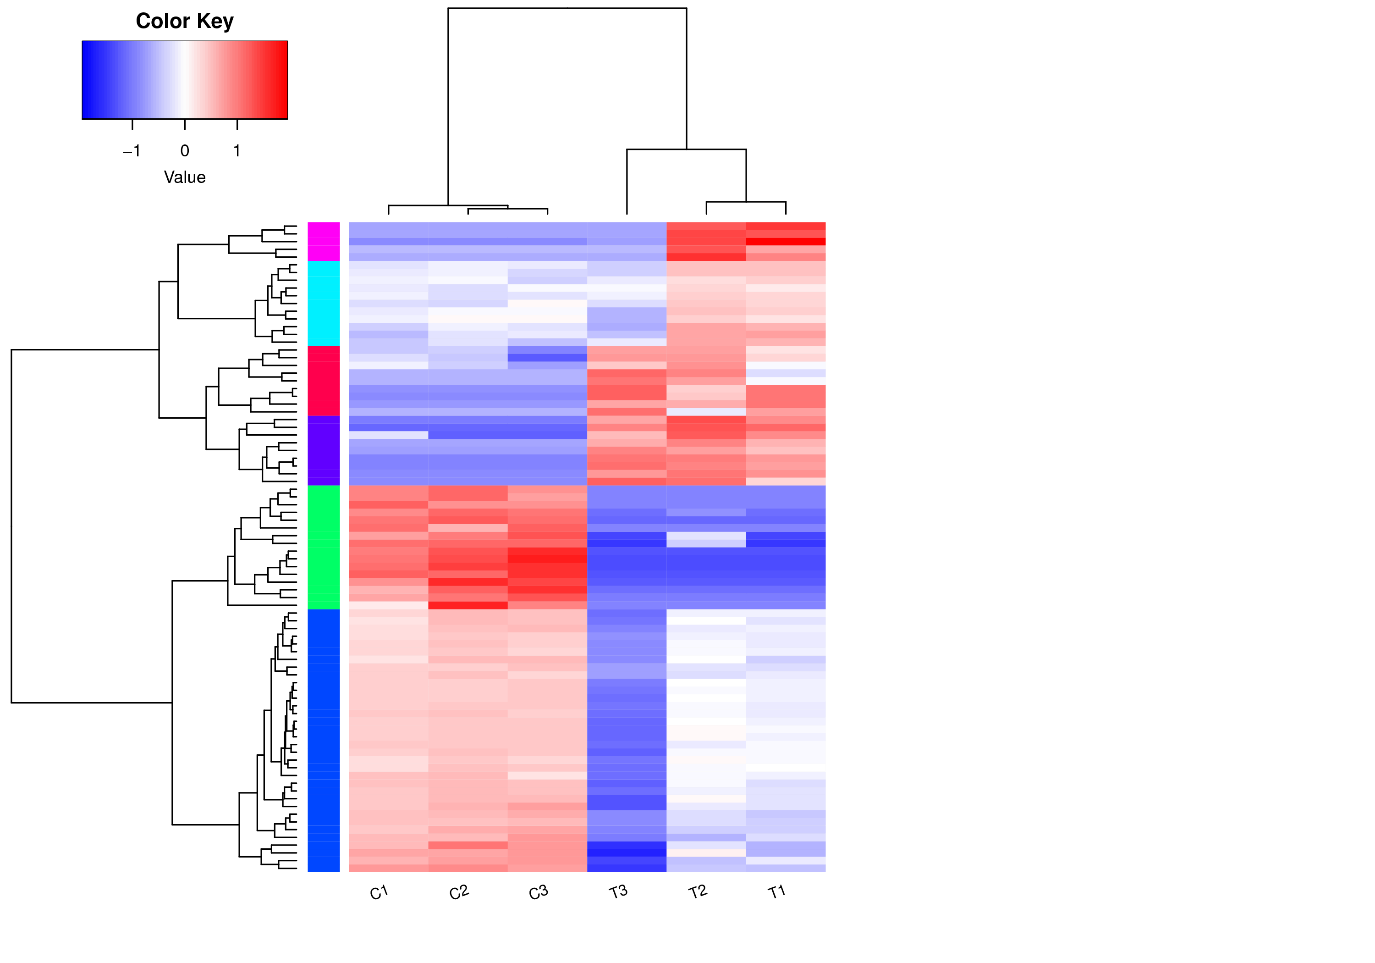


**Supplementary Figure-6**

Kinetic profile of biomass growth and 2-PE production by *C. sorboxylosa* under optimized conditions. The profile shows a concomitant increase in biomass and 2-PE production during the early phase (24-72 h), followed by only marginal improvement in 2-PE concentration despite continued biomass growth, indicating partially growth-associated production
